# Supplementary material
Source: PubMed Central journal article supplement (PMC3586968)
Supplement: CJN.05540512_CJN05540512SupplementaryData.pdf [file CJN.05540512_CJN05540512SupplementaryData.pdf]

| Supplemental Data Table 1<br>UNNM-01-12VW |           | Fold of Change |              |              | Statistical Values |         |              |         |              |         | Mean Values |       |       | Standard Deviation |       |       |
|-------------------------------------------|-----------|----------------|--------------|--------------|--------------------|---------|--------------|---------|--------------|---------|-------------|-------|-------|--------------------|-------|-------|
|                                           |           | CKD3<br>CKD2   | CKD4<br>CKD2 | CKD4<br>CKD3 | CKD3<br>CKD2       |         | CKD4<br>CKD2 |         | CKD4<br>CKD3 |         | CKD2        | CKD3  | CKD4  | CKD2               | CKD3  | CKD4  |
|                                           |           |                |              |              | p-value            | q-value | p-value      | q-value | p-value      | q-value |             |       |       |                    |       |       |
| Biochemical Name                          | Platform  |                |              |              |                    |         |              |         |              |         |             |       |       |                    |       |       |
| glycine                                   | GC/MS     | 1.3            | 1.36         | 1.04         | 0.08               | 0.08    | 0.04         | 0.03    | 0.73         | 0.98    | 0.845       | 1.100 | 1.147 | 0.341              | 0.344 | 0.333 |
| N-acetylglycine                           | GC/MS     | 1.45           | 1.21         | 0.84         | 0.02               | 0.04    | 0.30         | 0.14    | 0.24         | 0.88    | 0.641       | 0.929 | 0.777 | 0.125              | 0.320 | 0.336 |
| serine                                    | GC/MS     | 1.31           | 1.31         | 1            | 0.02               | 0.04    | 0.01         | 0.01    | 0.96         | 0.99    | 0.812       | 1.063 | 1.063 | 0.239              | 0.180 | 0.154 |
| threonine                                 | GC/MS     | 1.15           | 1.21         | 1.06         | 0.41               | 0.20    | 0.10         | 0.06    | 0.58         | 0.92    | 0.898       | 1.028 | 1.088 | 0.194              | 0.327 | 0.264 |
| betaine                                   | LC/MS pos | 0.82           | 0.54         | 0.66         | 0.15               | 0.12    | 0.00         | 0.00    | 0.13         | 0.88    | 1.478       | 1.209 | 0.793 | 0.410              | 0.802 | 0.402 |
| aspartate                                 | GC/MS     | 1.15           | 1.22         | 1.06         | 0.33               | 0.18    | 0.28         | 0.13    | 0.83         | 0.98    | 0.869       | 0.998 | 1.057 | 0.387              | 0.331 | 0.434 |
| asparagine                                | GC/MS     | 1.36           | 1.58         | 1.16         | 0.09               | 0.09    | 0.01         | 0.01    | 0.29         | 0.88    | 0.798       | 1.087 | 1.261 | 0.302              | 0.435 | 0.475 |
| alanine                                   | GC/MS     | 1.31           | 1.42         | 1.09         | 0.02               | 0.04    | 0.01         | 0.01    | 0.32         | 0.88    | 0.803       | 1.051 | 1.144 | 0.253              | 0.175 | 0.216 |
| N-acetylalanine                           | LC/MS neg | 1.38           | 1.54         | 1.12         | 0.13               | 0.11    | 0.06         | 0.05    | 0.68         | 0.98    | 0.815       | 1.127 | 1.258 | 0.314              | 0.594 | 0.833 |
| glutamate                                 | GC/MS     | 0.8            | 1.07         | 1.34         | 0.43               | 0.21    | 0.79         | 0.29    | 0.32         | 0.88    | 1.188       | 0.950 | 1.276 | 0.746              | 0.245 | 0.676 |
| glutamine                                 | LC/MS pos | 0.98           | 0.92         | 0.94         | 0.69               | 0.26    | 0.22         | 0.11    | 0.53         | 0.92    | 1.043       | 1.024 | 0.963 | 0.127              | 0.212 | 0.178 |
| pyroglutamine*                            | LC/MS pos | 2.03           | 1.33         | 0.65         | 0.11               | 0.10    | 0.58         | 0.22    | 0.30         | 0.88    | 0.825       | 1.677 | 1.095 | 0.462              | 1.325 | 0.813 |
| histidine                                 | LC/MS neg | 1.09           | 1.09         | 1            | 0.16               | 0.12    | 0.16         | 0.09    | 0.98         | 0.99    | 0.918       | 1.004 | 1.003 | 0.132              | 0.128 | 0.134 |
| 3-methylhistidine                         | LC/MS neg | 1.65           | 2.66         | 1.61         | 0.46               | 0.21    | 0.44         | 0.18    | 0.88         | 0.98    | 1.013       | 1.674 | 2.693 | 0.886              | 1.952 | 4.134 |
| lysine                                    | LC/MS pos | 0.66           | 0.59         | 0.9          | 0.02               | 0.04    | 0.00         | 0.00    | 0.79         | 0.98    | 1.270       | 0.834 | 0.751 | 0.286              | 0.454 | 0.342 |
| pipecolate                                | LC/MS pos | 1.1            | 0.96         | 0.87         | 0.96               | 0.31    | 0.84         | 0.29    | 0.82         | 0.98    | 1.395       | 1.538 | 1.337 | 1.149              | 1.344 | 1.133 |
| N6-acetyllysine                           | LC/MS pos | 1.47           | 1.56         | 1.06         | 0.03               | 0.04    | 0.13         | 0.07    | 0.86         | 0.98    | 0.902       | 1.328 | 1.406 | 0.266              | 0.541 | 0.967 |
| glutaroyl carnitine                       | LC/MS pos | 1.57           | 1.63         | 1.04         | 0.04               | 0.06    | 0.30         | 0.14    | 0.59         | 0.92    | 0.813       | 1.275 | 1.329 | 0.429              | 0.585 | 1.199 |
| phenylalanine                             | LC/MS pos | 1.3            | 1.21         | 0.92         | 0.02               | 0.04    | 0.01         | 0.01    | 0.55         | 0.92    | 0.853       | 1.112 | 1.029 | 0.124              | 0.320 | 0.140 |
| phenylacetate                             | LC/MS neg | 1.39           | 1            | 0.72         | 0.07               | 0.07    |              |         | 0.07         | 0.88    | 0.507       | 0.707 | 0.507 | 0.000              | 0.311 | 0.000 |
| p-cresol sulfate                          | LC/MS neg | 1.91           | 1.61         | 0.84         | 0.22               | 0.15    | 0.31         | 0.14    | 0.82         | 0.98    | 0.945       | 1.802 | 1.521 | 0.860              | 1.939 | 1.288 |
| tyrosine                                  | LC/MS pos | 1.26           | 0.91         | 0.72         | 0.52               | 0.23    | 0.34         | 0.15    | 0.27         | 0.88    | 1.049       | 1.327 | 0.956 | 0.212              | 0.776 | 0.175 |
| 3-(4-hydroxyphenyl)lactate                | GC/MS     | 1.5            | 0.99         | 0.66         | 0.51               | 0.22    | 0.79         | 0.29    | 0.41         | 0.90    | 0.901       | 1.353 | 0.892 | 0.373              | 1.261 | 0.574 |
| 3-methoxytyrosine                         | LC/MS pos | 1.42           | 1.43         | 1.01         | 0.00               | 0.01    | 0.01         | 0.01    | 0.97         | 0.99    | 0.697       | 0.987 | 0.995 | 0.144              | 0.212 | 0.279 |
| phenylacetylglutamine                     | LC/MS pos | 2.31           | 1.62         | 0.7          | 0.28               | 0.17    | 0.39         | 0.16    | 0.69         | 0.98    | 0.817       | 1.885 | 1.322 | 0.608              | 2.027 | 1.724 |
| phenol sulfate                            | LC/MS neg | 1.32           | 1.78         | 1.35         | 0.83               | 0.28    | 0.12         | 0.07    | 0.24         | 0.88    | 1.040       | 1.370 | 1.847 | 0.709              | 1.566 | 1.393 |
| kynurenine                                | LC/MS pos | 1.16           | 1.24         | 1.07         | 0.37               | 0.19    | 0.10         | 0.06    | 0.55         | 0.92    | 0.944       | 1.093 | 1.171 | 0.234              | 0.391 | 0.337 |
| tryptophan                                | LC/MS pos | 1              | 0.88         | 0.88         | 0.70               | 0.26    | 0.29         | 0.14    | 0.78         | 0.98    | 1.064       | 1.060 | 0.933 | 0.254              | 0.426 | 0.186 |
| indolelactate                             | LC/MS pos | 0.98           | 1.28         | 1.3          | 0.69               | 0.26    | 0.46         | 0.19    | 0.33         | 0.88    | 1.017       | 0.998 | 1.300 | 0.357              | 0.538 | 0.800 |
| indoleacetate                             | LC/MS pos | 0.65           | 0.55         | 0.85         | 0.03               | 0.04    | 0.01         | 0.01    | 0.25         | 0.88    | 1.572       | 1.015 | 0.859 | 0.731              | 0.384 | 0.428 |
| tryptophan betaine                        | LC/MS pos | 1.36           | 1.34         | 0.98         | 0.63               | 0.25    | 0.59         | 0.22    | 0.95         | 0.99    | 1.215       | 1.656 | 1.631 | 1.434              | 1.751 | 1.439 |
| serotonin (5HT)                           | LC/MS pos | 1.48           | 1.8          | 1.21         | 0.01               | 0.04    | 0.00         | 0.01    | 0.35         | 0.88    | 0.592       | 0.877 | 1.065 | 0.001              | 0.318 | 0.482 |
| C-glycosyltryptophan*                     | LC/MS pos | 1.78           | 2.31         | 1.3          | 0.04               | 0.06    | 0.01         | 0.01    | 0.44         | 0.91    | 0.734       | 1.306 | 1.694 | 0.314              | 1.076 | 1.771 |

| Supplemental Data Table 1<br>UNNM-01-12VW |           | Fold of Change |              |              | Statistical Values |         |              |         |              |         | Mean Values |       |       | Standard Deviation |       |       |
|-------------------------------------------|-----------|----------------|--------------|--------------|--------------------|---------|--------------|---------|--------------|---------|-------------|-------|-------|--------------------|-------|-------|
|                                           |           | CKD3<br>CKD2   | CKD4<br>CKD2 | CKD4<br>CKD3 | CKD3<br>CKD2       |         | CKD4<br>CKD2 |         | CKD4<br>CKD3 |         | CKD2        | CKD3  | CKD4  | CKD2               | CKD3  | CKD4  |
|                                           |           |                |              |              | p-value            | q-value | p-value      | q-value | p-value      | q-value |             |       |       |                    |       |       |
| Biochemical Name                          | Platform  |                |              |              |                    |         |              |         |              |         |             |       |       |                    |       |       |
| 3-indoxyl sulfate                         | LC/MS neg | 1.35           | 1.35         | 1            | 0.56               | 0.23    | 0.29         | 0.14    | 0.67         | 0.98    | 1.186       | 1.595 | 1.600 | 0.914              | 1.499 | 1.414 |
| indolepropionate                          | LC/MS pos | 1.44           | 0.78         | 0.54         | 0.57               | 0.23    | 0.40         | 0.17    | 0.18         | 0.88    | 1.179       | 1.703 | 0.920 | 0.620              | 1.802 | 0.603 |
| 3-methyl-2-oxobutyrate                    | LC/MS neg | 1.07           | 1.08         | 1.02         | 0.91               | 0.29    | 0.65         | 0.24    | 0.81         | 0.98    | 0.954       | 1.018 | 1.033 | 0.207              | 0.349 | 0.296 |
| 3-methyl-2-oxovalerate                    | LC/MS neg | 0.97           | 1.1          | 1.13         | 0.87               | 0.28    | 0.42         | 0.17    | 0.33         | 0.88    | 0.961       | 0.933 | 1.058 | 0.305              | 0.302 | 0.284 |
| beta-hydroxyisovalerate                   | LC/MS neg | 0.97           | 0.96         | 1            | 0.82               | 0.28    | 0.81         | 0.29    | 0.99         | 0.99    | 0.779       | 0.752 | 0.751 | 0.283              | 0.281 | 0.280 |
| alpha-hydroxyisocaproate                  | LC/MS neg | 1.1            | 1.24         | 1.13         | 0.72               | 0.26    | 0.60         | 0.23    | 0.83         | 0.98    | 0.580       | 0.635 | 0.718 | 0.148              | 0.321 | 0.585 |
| isoleucine                                | LC/MS pos | 0.95           | 1.08         | 1.15         | 0.79               | 0.27    | 0.32         | 0.14    | 0.07         | 0.88    | 1.004       | 0.950 | 1.088 | 0.279              | 0.185 | 0.161 |
| leucine                                   | LC/MS pos | 0.96           | 0.98         | 1.02         | 0.64               | 0.25    | 0.92         | 0.31    | 0.66         | 0.98    | 1.029       | 0.989 | 1.009 | 0.212              | 0.280 | 0.150 |
| valine                                    | LC/MS pos | 0.98           | 1.02         | 1.04         | 0.84               | 0.28    | 0.68         | 0.25    | 0.51         | 0.92    | 0.991       | 0.970 | 1.011 | 0.222              | 0.210 | 0.128 |
| 3-hydroxyisobutyrate                      | GC/MS     | 1.37           | 1.16         | 0.85         | 0.21               | 0.14    | 0.56         | 0.22    | 0.51         | 0.92    | 0.792       | 1.087 | 0.920 | 0.251              | 0.569 | 0.418 |
| 4-methyl-2-oxopentanoate                  | LC/MS neg | 0.99           | 1.07         | 1.09         | 0.71               | 0.26    | 0.58         | 0.22    | 0.44         | 0.91    | 0.974       | 0.961 | 1.045 | 0.269              | 0.395 | 0.277 |
| alpha-hydroxyisovalerate                  | LC/MS neg | 1.05           | 0.85         | 0.81         | 0.27               | 0.17    | 0.12         | 0.07    | 0.77         | 0.98    | 2.256       | 2.360 | 1.920 | 1.314              | 3.850 | 3.316 |
| isobutyrylcarnitine                       | LC/MS pos | 1.44           | 1.59         | 1.1          | 0.32               | 0.18    | 0.14         | 0.08    | 0.66         | 0.98    | 1.066       | 1.534 | 1.693 | 1.030              | 1.283 | 1.554 |
| 2-methylbutyrylcarnitine                  | LC/MS pos | 1.31           | 1.12         | 0.86         | 0.52               | 0.23    | 0.85         | 0.29    | 0.46         | 0.91    | 0.843       | 1.103 | 0.946 | 0.438              | 0.733 | 0.950 |
| isovalerylcarnitine                       | LC/MS pos | 1.07           | 1.16         | 1.09         | 0.77               | 0.27    | 0.60         | 0.23    | 0.80         | 0.98    | 1.039       | 1.109 | 1.206 | 0.438              | 0.479 | 0.570 |
| cysteine                                  | GC/MS     | 1.03           | 0.85         | 0.82         | 0.99               | 0.31    | 0.27         | 0.13    | 0.31         | 0.88    | 1.052       | 1.078 | 0.890 | 0.297              | 0.408 | 0.322 |
| methionine                                | LC/MS neg | 1.36           | 1.09         | 0.8          | 0.15               | 0.12    | 0.13         | 0.07    | 0.35         | 0.88    | 0.943       | 1.285 | 1.025 | 0.128              | 0.660 | 0.101 |
| 2-hydroxybutyrate (AHB)                   | GC/MS     | 1.4            | 1.37         | 0.98         | 0.25               | 0.17    | 0.28         | 0.13    | 0.94         | 0.99    | 0.832       | 1.164 | 1.136 | 0.454              | 0.732 | 0.689 |
| dimethylarginine (SDMA + ADMA)            | LC/MS pos | 8.06           | 4.84         | 0.6          | 0.00               | 0.00    | 0.01         | 0.01    | 0.17         | 0.88    | 0.497       | 4.006 | 2.403 | 0.133              | 2.273 | 1.774 |
| arginine                                  | LC/MS neg | 1.51           | 1.53         | 1.01         | 0.06               | 0.07    | 0.10         | 0.06    | 0.93         | 0.99    | 0.675       | 1.020 | 1.032 | 0.238              | 0.480 | 0.559 |
| ornithine                                 | LC/MS pos | 0.28           | 0.16         | 0.57         | 0.00               | 0.00    | 0.00         | 0.00    | 0.34         | 0.88    | 4.327       | 1.195 | 0.683 | 1.387              | 1.316 | 0.334 |
| urea                                      | GC/MS     | 1.32           | 1.51         | 1.14         | 0.17               | 0.13    | 0.09         | 0.06    | 0.67         | 0.98    | 0.803       | 1.062 | 1.210 | 0.351              | 0.474 | 0.772 |
| proline                                   | LC/MS pos | 1.28           | 0.97         | 0.76         | 0.21               | 0.14    | 0.84         | 0.29    | 0.15         | 0.88    | 0.966       | 1.239 | 0.936 | 0.260              | 0.518 | 0.246 |
| citrulline                                | LC/MS pos | 1.58           | 1.31         | 0.83         | 0.03               | 0.05    | 0.08         | 0.05    | 0.42         | 0.90    | 0.825       | 1.304 | 1.082 | 0.194              | 0.586 | 0.362 |
| N-acetylorithine                          | LC/MS pos | 1.66           | 1.39         | 0.84         | 0.09               | 0.09    | 0.07         | 0.05    | 0.87         | 0.98    | 0.905       | 1.501 | 1.257 | 0.762              | 0.999 | 0.400 |
| trans-4-hydroxyproline                    | GC/MS     | 1.23           | 1.4          | 1.14         | 0.44               | 0.21    | 0.25         | 0.12    | 0.71         | 0.98    | 0.973       | 1.199 | 1.361 | 0.362              | 0.581 | 0.937 |
| creatine                                  | LC/MS pos | 0.97           | 1.22         | 1.25         | 0.64               | 0.25    | 0.85         | 0.29    | 0.58         | 0.92    | 0.978       | 0.952 | 1.192 | 0.460              | 0.752 | 0.694 |
| creatinine                                | LC/MS pos | 1.16           | 1.23         | 1.06         | 0.75               | 0.26    | 0.98         | 0.33    | 0.82         | 0.98    | 1.085       | 1.264 | 1.337 | 0.296              | 0.655 | 1.344 |
| 2-aminobutyrate                           | LC/MS pos | 1.14           | 1.28         | 1.13         | 0.59               | 0.24    | 0.05         | 0.04    | 0.28         | 0.88    | 0.889       | 1.010 | 1.140 | 0.262              | 0.401 | 0.237 |
| 4-acetamidobutanoate                      | LC/MS pos | 2.17           | 1.71         | 0.79         | 0.17               | 0.13    | 0.15         | 0.08    | 0.85         | 0.98    | 0.866       | 1.876 | 1.483 | 0.232              | 2.613 | 1.542 |
| 5-oxoproline                              | LC/MS pos | 1.46           | 1.42         | 0.97         | 0.03               | 0.04    | 0.09         | 0.06    | 0.74         | 0.98    | 0.806       | 1.180 | 1.140 | 0.309              | 0.388 | 0.391 |
| aspartylphenylalanine                     | LC/MS pos | 2              | 3.56         | 1.78         | 0.02               | 0.04    | 0.00         | 0.00    | 0.07         | 0.88    | 0.354       | 0.710 | 1.261 | 0.000              | 0.496 | 0.798 |
| pro-hydroxy-pro                           | LC/MS pos | 2.49           | 4.46         | 1.79         | 0.03               | 0.05    | 0.00         | 0.00    | 0.05         | 0.88    | 0.466       | 1.162 | 2.079 | 0.251              | 1.268 | 1.677 |

| Supplemental Data Table 1<br>UNNM-01-12VW |           | Fold of Change |              |              | Statistical Values |         |              |         |              |         | Mean Values |       |       | Standard Deviation |       |       |
|-------------------------------------------|-----------|----------------|--------------|--------------|--------------------|---------|--------------|---------|--------------|---------|-------------|-------|-------|--------------------|-------|-------|
|                                           |           | CKD3<br>CKD2   | CKD4<br>CKD2 | CKD4<br>CKD3 | CKD3<br>CKD2       |         | CKD4<br>CKD2 |         | CKD4<br>CKD3 |         | CKD2        | CKD3  | CKD4  | CKD2               | CKD3  | CKD4  |
|                                           |           |                |              |              | p-value            | q-value | p-value      | q-value | p-value      | q-value |             |       |       |                    |       |       |
| Biochemical Name                          | Platform  |                |              |              |                    |         |              |         |              |         |             |       |       |                    |       |       |
| cyclo(leu-pro)                            | LC/MS pos | 0.55           | 0.36         | 0.65         | 0.42               | 0.21    | 0.11         | 0.07    | 0.33         | 0.88    | 1.971       | 1.093 | 0.716 | 2.732              | 1.073 | 0.516 |
| phenylalanyltryptophan                    | LC/MS pos | 1.11           | 2.39         | 2.16         | 0.74               | 0.26    | 0.02         | 0.02    | 0.04         | 0.88    | 0.736       | 0.817 | 1.762 | 0.543              | 0.570 | 1.150 |
| gamma-glutamylvaline                      | LC/MS pos | 1.17           | 1.22         | 1.04         | 0.27               | 0.17    | 0.07         | 0.05    | 0.62         | 0.95    | 0.912       | 1.065 | 1.108 | 0.236              | 0.311 | 0.250 |
| gamma-glutamylleucine                     | LC/MS pos | 1.12           | 1.3          | 1.16         | 0.51               | 0.22    | 0.03         | 0.02    | 0.15         | 0.88    | 0.821       | 0.921 | 1.070 | 0.283              | 0.310 | 0.161 |
| gamma-glutamylisoleucine*                 | LC/MS pos | 1.61           | 1.7          | 1.06         | 0.01               | 0.03    | 0.01         | 0.01    | 0.78         | 0.98    | 0.695       | 1.117 | 1.184 | 0.196              | 0.440 | 0.510 |
| gamma-glutamylmethionine                  | LC/MS pos | 1.09           | 0.85         | 0.78         | 0.70               | 0.26    | 0.37         | 0.16    | 0.21         | 0.88    | 1.044       | 1.138 | 0.887 | 0.387              | 0.474 | 0.291 |
| gamma-glutamylglutamine                   | LC/MS pos | 3.83           | 4.78         | 1.25         | 0.00               | 0.00    | 0.00         | 0.00    | 0.13         | 0.88    | 0.275       | 1.053 | 1.313 | 0.166              | 0.417 | 0.349 |
| gamma-glutamylphenylalanine               | LC/MS pos | 1.45           | 1.29         | 0.89         | 0.03               | 0.04    | 0.01         | 0.01    | 0.59         | 0.92    | 0.903       | 1.311 | 1.165 | 0.240              | 0.480 | 0.181 |
| gamma-glutamyltyrosine                    | LC/MS pos | 1.19           | 0.97         | 0.82         | 0.55               | 0.23    | 0.95         | 0.32    | 0.53         | 0.92    | 0.993       | 1.179 | 0.966 | 0.366              | 0.631 | 0.193 |
| bradykinin, des-arg(9)                    | LC/MS pos | 4.95           | 1.42         | 0.29         | 0.26               | 0.17    | 0.17         | 0.09    | 0.60         | 0.92    | 0.764       | 3.779 | 1.083 | 0.306              | 7.550 | 0.651 |
| ADSGEGDFXAEGGGVR*                         | LC/MS pos | 2.06           | 2.82         | 1.37         | 0.01               | 0.03    | 0.00         | 0.00    | 0.24         | 0.88    | 0.465       | 0.957 | 1.311 | 0.000              | 0.516 | 0.761 |
| DSGEGDFXAEGGGVR*                          | LC/MS pos | 689.13         | 826.73       | 1.2          | 0.00               | 0.00    | 0.00         | 0.00    | 0.21         | 0.88    | 0.002       | 1.034 | 1.240 | 0.001              | 0.765 | 0.795 |
| ADpSGEGDFXAEGGGVR*                        | LC/MS pos | 18.01          | 45.27        | 2.51         | 0.00               | 0.01    | 0.00         | 0.00    | 0.04         | 0.88    | 0.045       | 0.818 | 2.055 | 0.017              | 0.683 | 2.624 |
| erythronate*                              | GC/MS     | 1.61           | 1.45         | 0.9          | 0.31               | 0.18    | 0.28         | 0.13    | 0.95         | 0.99    | 0.992       | 1.597 | 1.438 | 0.393              | 1.737 | 1.299 |
| fructose                                  | GC/MS     | 2.83           | 1.76         | 0.62         | 0.03               | 0.04    | 0.00         | 0.01    | 0.50         | 0.92    | 0.763       | 2.157 | 1.343 | 0.346              | 1.695 | 0.534 |
| mannitol                                  | GC/MS     | 6.94           | 3.8          | 0.55         | 0.08               | 0.09    | 0.02         | 0.02    | 0.98         | 0.99    | 0.216       | 1.495 | 0.819 | 0.059              | 2.326 | 0.745 |
| mannose                                   | GC/MS     | 0.67           | 0.68         | 1.02         | 0.19               | 0.14    | 0.24         | 0.12    | 0.78         | 0.98    | 1.572       | 1.046 | 1.070 | 1.004              | 0.444 | 0.365 |
| 1,5-anhydroglucitol (1,5-AG)              | LC/MS neg | 0.76           | 0.62         | 0.82         | 0.54               | 0.23    | 0.26         | 0.13    | 0.53         | 0.92    | 1.291       | 0.978 | 0.801 | 0.711              | 0.487 | 0.295 |
| glycerate                                 | GC/MS     | 0.69           | 0.51         | 0.74         | 0.04               | 0.05    | 0.00         | 0.00    | 0.02         | 0.88    | 1.185       | 0.823 | 0.608 | 0.378              | 0.225 | 0.163 |
| glucose                                   | GC/MS     | 0.69           | 0.71         | 1.02         | 0.09               | 0.09    | 0.11         | 0.06    | 0.83         | 0.98    | 1.422       | 0.984 | 1.003 | 0.697              | 0.307 | 0.293 |
| 1,6-anhydroglucose                        | GC/MS     | 0.55           | 0.49         | 0.89         | 0.33               | 0.18    | 0.29         | 0.14    | 0.96         | 0.99    | 1.391       | 0.759 | 0.675 | 1.891              | 0.751 | 0.510 |
| pyruvate                                  | GC/MS     | 0.48           | 0.39         | 0.8          | 0.01               | 0.03    | 0.00         | 0.00    | 0.33         | 0.88    | 1.921       | 0.925 | 0.744 | 1.014              | 0.526 | 0.453 |
| lactate                                   | GC/MS     | 0.91           | 0.93         | 1.02         | 0.63               | 0.25    | 0.58         | 0.22    | 0.86         | 0.98    | 1.210       | 1.100 | 1.127 | 0.434              | 0.310 | 0.558 |
| arabitol                                  | GC/MS     | 1.3            | 1.75         | 1.35         | 0.24               | 0.16    | 0.01         | 0.01    | 0.19         | 0.88    | 0.826       | 1.073 | 1.450 | 0.206              | 0.557 | 0.904 |
| gluconate                                 | GC/MS     | 1.43           | 1.01         | 0.7          | 0.99               | 0.31    | 0.69         | 0.25    | 0.73         | 0.98    | 0.859       | 1.232 | 0.866 | 0.663              | 2.085 | 0.462 |
| arabinose                                 | GC/MS     | 0.8            | 0.68         | 0.84         | 0.61               | 0.24    | 0.32         | 0.14    | 0.56         | 0.92    | 0.787       | 0.631 | 0.531 | 0.656              | 0.421 | 0.165 |
| xylonate                                  | GC/MS     | 1.8            | 2.35         | 1.3          | 0.13               | 0.11    | 0.05         | 0.04    | 0.56         | 0.92    | 0.636       | 1.145 | 1.493 | 0.025              | 1.131 | 1.648 |
| citrate                                   | GC/MS     | 0.76           | 0.51         | 0.67         | 0.08               | 0.08    | 0.00         | 0.00    | 0.04         | 0.88    | 1.506       | 1.147 | 0.773 | 0.499              | 0.501 | 0.218 |
| alpha-ketoglutarate                       | GC/MS     | 1.34           | 0.95         | 0.71         | 0.51               | 0.22    | 0.84         | 0.29    | 0.41         | 0.90    | 0.625       | 0.839 | 0.593 | 0.253              | 0.755 | 0.172 |
| succinate                                 | GC/MS     | 1.15           | 1.23         | 1.07         | 0.31               | 0.18    | 0.04         | 0.03    | 0.45         | 0.91    | 0.824       | 0.951 | 1.015 | 0.170              | 0.314 | 0.209 |
| malate                                    | GC/MS     | 0.68           | 0.51         | 0.75         | 0.06               | 0.07    | 0.00         | 0.00    | 0.23         | 0.88    | 1.344       | 0.918 | 0.690 | 0.471              | 0.486 | 0.162 |
| acetylphosphate                           | GC/MS     | 1.7            | 1.92         | 1.13         | 0.00               | 0.00    | 0.00         | 0.00    | 0.40         | 0.90    | 0.630       | 1.073 | 1.213 | 0.169              | 0.280 | 0.332 |
| phosphate                                 | GC/MS     | 0.44           | 0.3          | 0.69         | 0.00               | 0.00    | 0.00         | 0.00    | 0.41         | 0.90    | 2.679       | 1.167 | 0.804 | 0.452              | 0.910 | 0.190 |

| Supplemental Data Table 1<br>UNNM-01-12VW  |           | Fold of Change |              |              | Statistical Values |         |              |         |              |         | Mean Values |       |       | Standard Deviation |       |       |
|--------------------------------------------|-----------|----------------|--------------|--------------|--------------------|---------|--------------|---------|--------------|---------|-------------|-------|-------|--------------------|-------|-------|
|                                            |           | CKD3<br>CKD2   | CKD4<br>CKD2 | CKD4<br>CKD3 | CKD3<br>CKD2       |         | CKD4<br>CKD2 |         | CKD4<br>CKD3 |         | CKD2        | CKD3  | CKD4  | CKD2               | CKD3  | CKD4  |
|                                            |           |                |              |              | p-value            | q-value | p-value      | q-value | p-value      | q-value |             |       |       |                    |       |       |
| Biochemical Name                           | Platform  |                |              |              |                    |         |              |         |              |         |             |       |       |                    |       |       |
| linoleate (18:2n6)                         | LC/MS neg | 1.42           | 1.63         | 1.15         | 0.38               | 0.19    | 0.00         | 0.00    | 0.30         | 0.88    | 0.740       | 1.050 | 1.210 | 0.195              | 0.485 | 0.364 |
| linolenate [alpha or gamma; (18:3n3 or 6)] | LC/MS neg | 1.64           | 2.11         | 1.29         | 0.33               | 0.18    | 0.00         | 0.00    | 0.22         | 0.88    | 0.661       | 1.085 | 1.398 | 0.238              | 0.525 | 0.559 |
| dihomo-linolenate (20:3n3 or n6)           | LC/MS neg | 1.3            | 1.48         | 1.14         | 0.42               | 0.21    | 0.01         | 0.01    | 0.29         | 0.88    | 0.870       | 1.128 | 1.290 | 0.284              | 0.545 | 0.359 |
| eicosapentaenoate (EPA; 20:5n3)            | LC/MS neg | 2.37           | 3.73         | 1.57         | 0.16               | 0.13    | 0.00         | 0.00    | 0.12         | 0.88    | 0.607       | 1.438 | 2.262 | 0.365              | 1.432 | 1.490 |
| docosapentaenoate (n3 DPA; 22:5n3)         | LC/MS neg | 1.84           | 2.55         | 1.39         | 0.13               | 0.11    | 0.00         | 0.00    | 0.11         | 0.88    | 0.623       | 1.143 | 1.590 | 0.288              | 0.641 | 0.552 |
| docosahexaenoate (DHA; 22:6n3)             | LC/MS neg | 2.08           | 2.3          | 1.1          | 0.10               | 0.09    | 0.00         | 0.00    | 0.46         | 0.91    | 0.671       | 1.399 | 1.542 | 0.229              | 0.847 | 0.705 |
| caproate (6:0)                             | LC/MS neg | 1.67           | 2.11         | 1.26         | 0.06               | 0.07    | 0.00         | 0.00    | 0.17         | 0.88    | 0.562       | 0.940 | 1.186 | 0.374              | 0.435 | 0.383 |
| heptanoate (7:0)                           | LC/MS neg | 1.39           | 1.72         | 1.23         | 0.07               | 0.08    | 0.00         | 0.00    | 0.10         | 0.88    | 0.598       | 0.834 | 1.027 | 0.258              | 0.313 | 0.201 |
| caprylate (8:0)                            | LC/MS neg | 1.41           | 1.31         | 0.93         | 0.11               | 0.10    | 0.05         | 0.04    | 0.95         | 0.99    | 0.751       | 1.058 | 0.980 | 0.372              | 0.381 | 0.178 |
| pelargonate (9:0)                          | LC/MS neg | 1.3            | 1.5          | 1.15         | 0.04               | 0.05    | 0.00         | 0.00    | 0.10         | 0.88    | 0.744       | 0.970 | 1.112 | 0.172              | 0.217 | 0.114 |
| caprate (10:0)                             | LC/MS neg | 1.14           | 1.04         | 0.91         | 0.45               | 0.21    | 0.52         | 0.21    | 0.73         | 0.98    | 1.002       | 1.147 | 1.046 | 0.256              | 0.463 | 0.150 |
| undecanoate (11:0)                         | LC/MS neg | 1.44           | 1.57         | 1.09         | 0.01               | 0.03    | 0.00         | 0.00    | 0.48         | 0.92    | 0.818       | 1.178 | 1.283 | 0.194              | 0.356 | 0.371 |
| laurate (12:0)                             | LC/MS neg | 1.03           | 1.01         | 0.98         | 0.82               | 0.28    | 0.82         | 0.29    | 0.98         | 0.99    | 1.049       | 1.079 | 1.055 | 0.353              | 0.343 | 0.214 |
| 5-dodecenoate (12:1n7)                     | LC/MS neg | 2.46           | 0.71         | 0.29         | 0.09               | 0.09    | 0.16         | 0.09    | 0.01         | 0.88    | 1.084       | 2.663 | 0.767 | 0.629              | 2.585 | 0.309 |
| myristate (14:0)                           | LC/MS neg | 1.09           | 1.13         | 1.04         | 0.94               | 0.30    | 0.32         | 0.14    | 0.48         | 0.92    | 1.038       | 1.127 | 1.174 | 0.425              | 0.670 | 0.343 |
| myristoleate (14:1n5)                      | LC/MS neg | 1.2            | 0.91         | 0.76         | 0.62               | 0.25    | 0.63         | 0.23    | 0.89         | 0.98    | 1.463       | 1.756 | 1.331 | 1.409              | 1.773 | 0.544 |
| palmitate (16:0)                           | LC/MS neg | 1.2            | 1.25         | 1.04         | 0.64               | 0.25    | 0.08         | 0.05    | 0.50         | 0.92    | 0.920       | 1.104 | 1.150 | 0.315              | 0.528 | 0.313 |
| palmitoleate (16:1n7)                      | LC/MS neg | 1.14           | 1.07         | 0.94         | 0.87               | 0.28    | 0.36         | 0.16    | 0.40         | 0.90    | 1.263       | 1.440 | 1.357 | 1.006              | 1.394 | 0.555 |
| margarate (17:0)                           | LC/MS neg | 1.54           | 1.49         | 0.97         | 0.25               | 0.17    | 0.03         | 0.03    | 0.70         | 0.98    | 0.804       | 1.237 | 1.194 | 0.375              | 0.633 | 0.414 |
| 10-heptadecenoate (17:1n7)                 | LC/MS neg | 1.21           | 1.28         | 1.05         | 0.83               | 0.28    | 0.10         | 0.06    | 0.36         | 0.89    | 0.898       | 1.090 | 1.145 | 0.509              | 0.738 | 0.342 |
| stearate (18:0)                            | LC/MS neg | 1.2            | 1.25         | 1.04         | 0.53               | 0.23    | 0.11         | 0.06    | 0.59         | 0.92    | 0.938       | 1.123 | 1.171 | 0.294              | 0.441 | 0.367 |
| oleate (18:1n9)                            | LC/MS neg | 1.34           | 1.39         | 1.04         | 0.48               | 0.22    | 0.03         | 0.03    | 0.45         | 0.91    | 0.871       | 1.164 | 1.212 | 0.399              | 0.685 | 0.355 |
| cis-vaccenate (18:1n7)                     | GC/MS     | 0.23           | 0.64         | 2.73         | 0.09               | 0.09    | 0.62         | 0.23    | 0.19         | 0.88    | 1.181       | 0.277 | 0.757 | 1.524              | 0.187 | 0.839 |
| stearidonate (18:4n3)                      | LC/MS neg | 2.42           | 2.38         | 0.98         | 0.07               | 0.07    | 0.01         | 0.01    | 0.57         | 0.92    | 0.511       | 1.237 | 1.215 | 0.511              | 1.221 | 0.599 |
| nonadecanoate (19:0)                       | LC/MS neg | 1.58           | 1.59         | 1.01         | 0.11               | 0.10    | 0.01         | 0.01    | 0.59         | 0.92    | 0.705       | 1.115 | 1.124 | 0.263              | 0.668 | 0.345 |
| 10-nonadecenoate (19:1n9)                  | LC/MS neg | 1.61           | 1.37         | 0.85         | 0.50               | 0.22    | 0.05         | 0.04    | 0.57         | 0.92    | 0.909       | 1.461 | 1.248 | 0.712              | 1.338 | 0.419 |
| eicosenoate (20:1n9 or 11)                 | LC/MS neg | 1.72           | 1.39         | 0.81         | 0.45               | 0.21    | 0.08         | 0.05    | 0.70         | 0.98    | 0.980       | 1.686 | 1.365 | 0.655              | 1.755 | 0.575 |
| dihomo-linoleate (20:2n6)                  | LC/MS neg | 1.66           | 1.39         | 0.83         | 0.32               | 0.18    | 0.07         | 0.05    | 0.88         | 0.98    | 0.783       | 1.303 | 1.086 | 0.444              | 0.965 | 0.422 |
| dihomo-alpha-linolenate (20:3n3)           | LC/MS neg | 1.3            | 1.48         | 1.14         | 0.42               | 0.21    | 0.01         | 0.01    | 0.29         | 0.88    | 0.870       | 1.128 | 1.290 | 0.284              | 0.545 | 0.359 |
| arachidonate (20:4n6)                      | LC/MS neg | 1.86           | 2.2          | 1.18         | 0.01               | 0.03    | 0.00         | 0.00    | 0.19         | 0.88    | 0.631       | 1.176 | 1.386 | 0.180              | 0.501 | 0.304 |
| adrenate (22:4n6)                          | LC/MS neg | 1.39           | 1.41         | 1.01         | 0.34               | 0.18    | 0.02         | 0.02    | 0.52         | 0.92    | 0.869       | 1.210 | 1.221 | 0.403              | 0.625 | 0.291 |
| 3-hydroxydecanoate                         | LC/MS neg | 1.18           | 0.72         | 0.61         | 0.83               | 0.28    | 0.39         | 0.16    | 0.34         | 0.88    | 1.193       | 1.407 | 0.857 | 0.931              | 1.349 | 0.261 |
| 16-hydroxypalmitate                        | LC/MS neg | 0.95           | 0.63         | 0.67         | 0.73               | 0.26    | 0.07         | 0.05    | 0.20         | 0.88    | 1.491       | 1.422 | 0.946 | 0.859              | 0.935 | 0.229 |

| Supplemental Data Table 1<br>UNNM-01-12VW            |           | Fold of Change |              |              | Statistical Values |         |              |         |              |         | Mean Values |        |       | Standard Deviation |        |       |
|------------------------------------------------------|-----------|----------------|--------------|--------------|--------------------|---------|--------------|---------|--------------|---------|-------------|--------|-------|--------------------|--------|-------|
|                                                      |           | CKD3<br>CKD2   | CKD4<br>CKD2 | CKD4<br>CKD3 | CKD3<br>CKD2       |         | CKD4<br>CKD2 |         | CKD4<br>CKD3 |         | CKD2        | CKD3   | CKD4  | CKD2               | CKD3   | CKD4  |
|                                                      |           |                |              |              | p-value            | q-value | p-value      | q-value | p-value      | q-value |             |        |       |                    |        |       |
| Biochemical Name                                     | Platform  |                |              |              |                    |         |              |         |              |         |             |        |       |                    |        |       |
| 2-hydroxystearate                                    | LC/MS neg | 1.57           | 1.29         | 0.82         | 0.28               | 0.18    | 0.01         | 0.01    | 0.96         | 0.99    | 0.791       | 1.245  | 1.020 | 0.226              | 0.661  | 0.130 |
| 2-hydroxypalmitate                                   | LC/MS neg | 1.35           | 1.18         | 0.87         | 0.75               | 0.26    | 0.08         | 0.05    | 0.69         | 0.98    | 0.920       | 1.240  | 1.082 | 0.253              | 1.000  | 0.160 |
| sebacate (decanedioate)                              | LC/MS pos | 4.87           | 8.13         | 1.67         | 0.00               | 0.02    | 0.00         | 0.00    | 0.03         | 0.88    | 0.155       | 0.756  | 1.263 | 0.019              | 0.570  | 0.445 |
| azelate (nonanedioate)                               | LC/MS neg | 8.58           | 17.95        | 2.09         | 0.01               | 0.03    | 0.00         | 0.00    | 0.02         | 0.88    | 0.127       | 1.087  | 2.272 | 0.021              | 0.972  | 1.286 |
| octadecanedioate                                     | LC/MS neg | 0.98           | 0.67         | 0.69         | 0.14               | 0.12    | 0.05         | 0.04    | 0.87         | 0.98    | 1.215       | 1.195  | 0.819 | 0.532              | 1.897  | 0.703 |
| 3-carboxy-4-methyl-5-propyl-2-furanpropanoate (CMPE) | LC/MS neg | 18.28          | 23.58        | 1.29         | 0.06               | 0.07    | 0.00         | 0.00    | 0.17         | 0.88    | 0.307       | 5.608  | 7.234 | 0.279              | 11.864 | 7.195 |
| oleamide                                             | LC/MS pos | 1.03           | 1.28         | 1.24         | 0.73               | 0.26    | 0.87         | 0.30    | 0.64         | 0.96    | 1.029       | 1.061  | 1.313 | 0.727              | 1.201  | 1.174 |
| propionylcarnitine                                   | LC/MS pos | 0.86           | 0.81         | 0.95         | 0.36               | 0.19    | 0.21         | 0.11    | 0.72         | 0.98    | 1.126       | 0.968  | 0.917 | 0.418              | 0.336  | 0.376 |
| butyrylcarnitine                                     | LC/MS pos | 0.49           | 0.38         | 0.76         | 0.02               | 0.04    | 0.00         | 0.00    | 0.86         | 0.98    | 2.492       | 1.229  | 0.936 | 1.803              | 1.319  | 0.774 |
| isovalerate                                          | LC/MS neg | 2.03           | 2.43         | 1.2          | 0.01               | 0.03    | 0.00         | 0.00    | 0.16         | 0.88    | 0.481       | 0.975  | 1.168 | 0.148              | 0.421  | 0.211 |
| carnitine                                            | LC/MS pos | 0.62           | 0.61         | 0.97         | 0.00               | 0.01    | 0.00         | 0.00    | 0.87         | 0.98    | 1.390       | 0.867  | 0.844 | 0.185              | 0.372  | 0.207 |
| 3-dehydrocarnitine*                                  | LC/MS pos | 1.08           | 1.53         | 1.41         | 0.52               | 0.23    | 0.13         | 0.07    | 0.26         | 0.88    | 1.023       | 1.105  | 1.563 | 0.469              | 0.409  | 1.167 |
| acetylcarnitine                                      | LC/MS pos | 0.95           | 0.88         | 0.92         | 0.61               | 0.24    | 0.37         | 0.16    | 0.73         | 0.98    | 1.219       | 1.156  | 1.069 | 0.428              | 0.581  | 0.487 |
| hexanoylcarnitine                                    | LC/MS pos | 0.88           | 0.97         | 1.1          | 0.58               | 0.24    | 0.95         | 0.32    | 0.52         | 0.92    | 1.234       | 1.085  | 1.194 | 0.791              | 0.549  | 0.507 |
| octanoylcarnitine                                    | LC/MS pos | 0.88           | 0.84         | 0.96         | 0.91               | 0.29    | 0.97         | 0.32    | 0.85         | 0.98    | 1.369       | 1.201  | 1.151 | 1.279              | 0.769  | 0.663 |
| decanoylcarnitine                                    | LC/MS pos | 0.71           | 0.62         | 0.87         | 0.54               | 0.23    | 0.30         | 0.14    | 0.63         | 0.96    | 1.712       | 1.216  | 1.056 | 1.794              | 0.696  | 0.583 |
| laurylcarnitine                                      | LC/MS pos | 0.82           | 0.56         | 0.68         | 0.75               | 0.26    | 0.35         | 0.15    | 0.58         | 0.92    | 2.043       | 1.683  | 1.143 | 2.256              | 1.323  | 0.675 |
| palmitoylcarnitine                                   | LC/MS pos | 0.93           | 0.55         | 0.59         | 0.50               | 0.22    | 0.02         | 0.02    | 0.19         | 0.88    | 1.511       | 1.412  | 0.837 | 0.746              | 1.112  | 0.386 |
| oleoylcarnitine                                      | LC/MS pos | 0.87           | 0.66         | 0.76         | 0.33               | 0.18    | 0.11         | 0.07    | 0.76         | 0.98    | 1.749       | 1.514  | 1.147 | 1.334              | 1.525  | 0.959 |
| cholate                                              | LC/MS neg | 0.55           | 1.4          | 2.54         | 0.62               | 0.25    | 0.89         | 0.30    | 0.55         | 0.92    | 2.633       | 1.454  | 3.696 | 4.482              | 2.108  | 6.210 |
| glycocholate                                         | LC/MS pos | 1.96           | 0.13         | 0.07         | 0.45               | 0.21    | 0.01         | 0.01    | 0.14         | 0.88    | 4.207       | 8.244  | 0.549 | 4.058              | 20.881 | 0.310 |
| taurocholate                                         | LC/MS neg | 14.75          | 0.36         | 0.02         | 0.58               | 0.24    | 0.05         | 0.04    | 0.15         | 0.88    | 1.346       | 19.863 | 0.491 | 1.163              | 44.588 | 0.189 |
| taurochenodeoxycholate                               | LC/MS neg | 12.48          | 0.19         | 0.01         | 0.83               | 0.28    | 0.04         | 0.03    | 0.29         | 0.88    | 2.078       | 25.940 | 0.386 | 2.057              | 62.115 | 0.351 |
| ursodeoxycholate                                     | LC/MS neg | 1.23           | 1.12         | 0.91         | 0.68               | 0.26    | 0.83         | 0.29    | 0.85         | 0.98    | 1.016       | 1.250  | 1.138 | 0.452              | 1.606  | 1.089 |
| hyodeoxycholate                                      | LC/MS neg | 0.24           | 0.36         | 1.51         | 0.00               | 0.00    | 0.00         | 0.00    | 0.07         | 0.88    | 2.681       | 0.641  | 0.967 | 1.772              | 0.549  | 0.596 |
| glycochenodeoxycholate                               | LC/MS neg | 2.92           | 0.11         | 0.04         | 0.20               | 0.14    | 0.00         | 0.00    | 0.21         | 0.88    | 12.067      | 35.263 | 1.339 | 12.006             | 99.211 | 1.991 |
| glycolithocholate sulfate*                           | LC/MS neg | 0.64           | 0.7          | 1.1          | 0.48               | 0.22    | 0.41         | 0.17    | 0.80         | 0.98    | 1.459       | 0.933  | 1.022 | 1.220              | 0.533  | 0.803 |
| tauroolithocholate 3-sulfate                         | LC/MS neg | 1.68           | 0.89         | 0.53         | 0.53               | 0.23    | 0.88         | 0.30    | 0.44         | 0.91    | 1.002       | 1.684  | 0.896 | 0.741              | 1.675  | 0.604 |
| glycochenolate sulfate*                              | LC/MS neg | 0.76           | 1.05         | 1.38         | 0.28               | 0.17    | 0.77         | 0.28    | 0.16         | 0.88    | 1.091       | 0.832  | 1.147 | 0.524              | 0.436  | 0.538 |
| taurochenolate sulfate*                              | LC/MS neg | 2.68           | 1.76         | 0.66         | 0.02               | 0.04    | 0.03         | 0.03    | 0.42         | 0.90    | 0.678       | 1.816  | 1.193 | 0.376              | 1.586  | 0.755 |
| glycerol                                             | GC/MS     | 0.74           | 0.79         | 1.06         | 0.03               | 0.05    | 0.08         | 0.05    | 0.83         | 0.98    | 1.153       | 0.856  | 0.906 | 0.290              | 0.331  | 0.375 |
| choline                                              | LC/MS pos | 1.38           | 1.32         | 0.95         | 0.05               | 0.06    | 0.08         | 0.05    | 0.73         | 0.98    | 0.836       | 1.157  | 1.100 | 0.334              | 0.344  | 0.376 |

| Supplemental Data Table 1<br>UNNM-01-12VW      |           | Fold of Change |              |              | Statistical Values |         |              |         |              |         | Mean Values |       |       | Standard Deviation |       |       |
|------------------------------------------------|-----------|----------------|--------------|--------------|--------------------|---------|--------------|---------|--------------|---------|-------------|-------|-------|--------------------|-------|-------|
|                                                |           | CKD3<br>CKD2   | CKD4<br>CKD2 | CKD4<br>CKD3 | CKD3<br>CKD2       |         | CKD4<br>CKD2 |         | CKD4<br>CKD3 |         | CKD2        | CKD3  | CKD4  | CKD2               | CKD3  | CKD4  |
|                                                |           |                |              |              | p-value            | q-value | p-value      | q-value | p-value      | q-value |             |       |       |                    |       |       |
| Biochemical Name                               | Platform  |                |              |              |                    |         |              |         |              |         |             |       |       |                    |       |       |
| glycerol 3-phosphate (G3P)                     | GC/MS     | 1.36           | 1.76         | 1.29         | 0.06               | 0.07    | 0.00         | 0.00    | 0.04         | 0.88    | 0.791       | 1.080 | 1.395 | 0.221              | 0.385 | 0.297 |
| glycerophosphorylcholine (GPC)                 | LC/MS pos | 1.72           | 2.54         | 1.48         | 0.32               | 0.18    | 0.00         | 0.00    | 0.08         | 0.88    | 0.557       | 0.959 | 1.416 | 0.254              | 0.974 | 0.835 |
| myo-inositol                                   | GC/MS     | 2.27           | 2.01         | 0.89         | 0.03               | 0.05    | 0.01         | 0.01    | 0.98         | 0.99    | 0.810       | 1.841 | 1.631 | 0.340              | 1.671 | 1.157 |
| scyllo-inositol                                | GC/MS     | 1.97           | 1.27         | 0.64         | 0.15               | 0.12    | 0.34         | 0.15    | 0.45         | 0.91    | 0.586       | 1.156 | 0.742 | 0.335              | 1.214 | 0.467 |
| 3-hydroxybutyrate (BHBA)                       | GC/MS     | 1.56           | 1.3          | 0.84         | 0.36               | 0.19    | 0.34         | 0.15    | 0.96         | 0.99    | 1.258       | 1.958 | 1.641 | 1.174              | 2.082 | 1.290 |
| 1-oleoylglycerophosphoethanolamine             | LC/MS neg | 0.69           | 0.46         | 0.66         | 0.09               | 0.09    | 0.01         | 0.01    | 0.40         | 0.90    | 1.702       | 1.172 | 0.779 | 0.943              | 1.106 | 0.422 |
| 1-linoleoylglycerophosphoethanolamine*         | LC/MS neg | 0.66           | 0.61         | 0.93         | 0.04               | 0.05    | 0.02         | 0.02    | 0.82         | 0.98    | 1.534       | 1.012 | 0.940 | 0.742              | 0.560 | 0.397 |
| 1-arachidonoylglycerophosphoethanolamine*      | LC/MS neg | 0.83           | 0.93         | 1.12         | 0.15               | 0.12    | 0.49         | 0.20    | 0.40         | 0.90    | 1.104       | 0.912 | 1.025 | 0.288              | 0.294 | 0.302 |
| 2-arachidonoylglycerophosphoethanolamine*      | LC/MS neg | 0.74           | 0.95         | 1.29         | 0.06               | 0.07    | 0.55         | 0.21    | 0.36         | 0.89    | 1.061       | 0.783 | 1.008 | 0.367              | 0.277 | 0.528 |
| 1-myristoylglycerophosphocholine               | LC/MS pos | 0.53           | 0.46         | 0.86         | 0.03               | 0.05    | 0.01         | 0.01    | 0.89         | 0.98    | 1.741       | 0.931 | 0.805 | 0.785              | 0.651 | 0.492 |
| 1-palmitoylglycerophosphocholine               | LC/MS pos | 0.73           | 0.69         | 0.94         | 0.01               | 0.03    | 0.00         | 0.00    | 0.78         | 0.98    | 1.266       | 0.923 | 0.870 | 0.241              | 0.287 | 0.194 |
| 2-palmitoylglycerophosphocholine*              | LC/MS pos | 0.56           | 0.53         | 0.95         | 0.00               | 0.01    | 0.00         | 0.00    | 0.82         | 0.98    | 1.519       | 0.843 | 0.802 | 0.378              | 0.431 | 0.428 |
| 1-palmitoleoylglycerophosphocholine*           | LC/MS pos | 0.33           | 0.36         | 1.11         | 0.01               | 0.03    | 0.04         | 0.03    | 0.51         | 0.92    | 2.690       | 0.882 | 0.976 | 1.815              | 1.057 | 0.668 |
| 1-heptadecanoylglycerophosphocholine           | LC/MS pos | 0.87           | 0.55         | 0.63         | 0.52               | 0.23    | 0.01         | 0.01    | 0.02         | 0.88    | 1.349       | 1.173 | 0.741 | 0.536              | 0.545 | 0.255 |
| 1-stearoylglycerophosphocholine                | LC/MS pos | 0.88           | 0.75         | 0.85         | 0.29               | 0.18    | 0.05         | 0.04    | 0.58         | 0.92    | 1.243       | 1.096 | 0.928 | 0.328              | 0.544 | 0.359 |
| 2-stearoylglycerophosphocholine*               | LC/MS pos | 0.67           | 0.61         | 0.91         | 0.11               | 0.10    | 0.05         | 0.04    | 0.71         | 0.98    | 1.426       | 0.956 | 0.869 | 0.703              | 0.609 | 0.591 |
| 1-oleoylglycerophosphocholine                  | LC/MS pos | 0.6            | 0.57         | 0.95         | 0.03               | 0.04    | 0.02         | 0.02    | 0.84         | 0.98    | 1.591       | 0.962 | 0.911 | 0.635              | 0.440 | 0.351 |
| 2-oleoylglycerophosphocholine*                 | LC/MS pos | 0.58           | 0.43         | 0.73         | 0.01               | 0.03    | 0.00         | 0.00    | 0.33         | 0.88    | 1.764       | 1.030 | 0.756 | 0.714              | 0.628 | 0.269 |
| 1-linoleoylglycerophosphocholine               | LC/MS pos | 0.75           | 0.68         | 0.91         | 0.03               | 0.04    | 0.00         | 0.01    | 0.52         | 0.92    | 1.270       | 0.948 | 0.866 | 0.323              | 0.259 | 0.232 |
| 1-eicosatrienoylglycerophosphocholine*         | LC/MS pos | 0.69           | 0.75         | 1.1          | 0.18               | 0.13    | 0.35         | 0.15    | 0.50         | 0.92    | 1.457       | 1.004 | 1.100 | 0.768              | 0.474 | 0.422 |
| 1-arachidonoylglycerophosphocholine*           | LC/MS pos | 1.26           | 1.47         | 1.17         | 0.68               | 0.26    | 0.01         | 0.01    | 0.23         | 0.88    | 0.905       | 1.139 | 1.333 | 0.227              | 0.613 | 0.394 |
| 1-docosahexaenoylglycerophosphocholine*        | LC/MS pos | 1.18           | 1.46         | 1.23         | 0.21               | 0.14    | 0.00         | 0.01    | 0.11         | 0.88    | 0.863       | 1.019 | 1.256 | 0.163              | 0.284 | 0.341 |
| 1-palmitoylglycerol (1-monopalmitin)           | GC/MS     | 0.67           | 0.43         | 0.64         | 0.21               | 0.15    | 0.01         | 0.01    | 0.09         | 0.88    | 1.287       | 0.866 | 0.556 | 0.793              | 0.532 | 0.188 |
| 1-linoleoylglycerol (1-monolinolein)           | LC/MS neg | 4.79           | 6.73         | 1.41         | 0.00               | 0.00    | 0.00         | 0.00    | 0.09         | 0.88    | 0.310       | 1.481 | 2.084 | 0.193              | 0.923 | 0.762 |
| stearoyl sphingomyelin                         | GC/MS     | 2.14           | 2.07         | 0.96         | 0.34               | 0.18    | 0.29         | 0.14    | 0.97         | 0.99    | 0.574       | 1.232 | 1.187 | 0.416              | 1.097 | 1.034 |
| lathosterol                                    | GC/MS     | 1.14           | 0.82         | 0.72         | 0.65               | 0.25    | 0.53         | 0.21    | 0.28         | 0.88    | 0.524       | 0.596 | 0.428 | 0.386              | 0.409 | 0.201 |
| cholesterol                                    | GC/MS     | 1.03           | 1.01         | 0.97         | 1.00               | 0.31    | 0.98         | 0.32    | 0.99         | 0.99    | 1.017       | 1.051 | 1.022 | 0.160              | 0.328 | 0.210 |
| dehydroisoandrosterone sulfate (DHEA-S)        | LC/MS neg | 0.87           | 0.55         | 0.64         | 0.32               | 0.18    | 0.04         | 0.03    | 0.52         | 0.92    | 1.478       | 1.280 | 0.819 | 0.878              | 0.933 | 0.685 |
| epiandrosterone sulfate                        | LC/MS neg | 0.51           | 0.77         | 1.5          | 0.06               | 0.07    | 0.15         | 0.08    | 0.94         | 0.99    | 1.594       | 0.819 | 1.232 | 1.022              | 0.481 | 1.267 |
| androsterone sulfate                           | LC/MS neg | 0.45           | 0.53         | 1.18         | 0.05               | 0.07    | 0.06         | 0.05    | 0.95         | 0.99    | 2.135       | 0.956 | 1.124 | 1.846              | 0.709 | 1.180 |
| cortisol                                       | LC/MS pos | 0.68           | 0.62         | 0.9          | 0.10               | 0.09    | 0.03         | 0.03    | 0.79         | 0.98    | 1.449       | 0.992 | 0.894 | 0.718              | 0.469 | 0.379 |
| cortisone                                      | LC/MS pos | 0.86           | 0.59         | 0.69         | 0.20               | 0.14    | 0.00         | 0.01    | 0.08         | 0.88    | 1.059       | 0.907 | 0.628 | 0.203              | 0.320 | 0.276 |
| 7-alpha-hydroxy-3-oxo-4-cholestenoate (7-Hoca) | LC/MS neg | 0.78           | 0.86         | 1.09         | 0.30               | 0.18    | 0.43         | 0.18    | 0.86         | 0.98    | 1.550       | 1.214 | 1.326 | 1.084              | 1.102 | 1.122 |

| Supplemental Data Table 1<br>UNNM-01-12VW    |           | Fold of Change |              |              | Statistical Values |         |              |         |              |         | Mean Values |       |       | Standard Deviation |       |       |
|----------------------------------------------|-----------|----------------|--------------|--------------|--------------------|---------|--------------|---------|--------------|---------|-------------|-------|-------|--------------------|-------|-------|
|                                              |           | CKD3<br>CKD2   | CKD4<br>CKD2 | CKD4<br>CKD3 | CKD3<br>CKD2       |         | CKD4<br>CKD2 |         | CKD4<br>CKD3 |         | CKD2        | CKD3  | CKD4  | CKD2               | CKD3  | CKD4  |
|                                              |           |                |              |              | p-value            | q-value | p-value      | q-value | p-value      | q-value |             |       |       |                    |       |       |
| Biochemical Name                             | Platform  |                |              |              |                    |         |              |         |              |         |             |       |       |                    |       |       |
| 4-androsten-3beta,17beta-diol disulfate 1*   | LC/MS neg | 0.55           | 0.26         | 0.47         | 0.09               | 0.09    | 0.01         | 0.01    | 0.54         | 0.92    | 3.909       | 2.164 | 1.020 | 3.756              | 3.462 | 0.958 |
| 4-androsten-3beta,17beta-diol disulfate 2*   | LC/MS neg | 0.97           | 0.54         | 0.55         | 0.52               | 0.23    | 0.01         | 0.01    | 0.11         | 0.88    | 1.254       | 1.219 | 0.675 | 0.535              | 0.802 | 0.452 |
| 5alpha-androstan-3beta,17beta-diol disulfate | LC/MS neg | 0.39           | 0.27         | 0.7          | 0.02               | 0.04    | 0.00         | 0.00    | 0.42         | 0.90    | 2.602       | 1.008 | 0.710 | 1.989              | 1.040 | 0.848 |
| pregnen-diol disulfate*                      | LC/MS neg | 0.67           | 0.34         | 0.5          | 0.17               | 0.13    | 0.00         | 0.00    | 0.13         | 0.88    | 2.035       | 1.360 | 0.682 | 1.725              | 1.112 | 0.483 |
| xanthine                                     | LC/MS pos | 2.37           | 4.27         | 1.8          | 0.04               | 0.06    | 0.00         | 0.01    | 0.18         | 0.88    | 0.502       | 1.189 | 2.146 | 0.118              | 1.196 | 2.334 |
| hypoxanthine                                 | LC/MS neg | 1.01           | 1.03         | 1.02         | 0.34               | 0.18    | 0.26         | 0.13    | 0.48         | 0.92    | 0.938       | 0.947 | 0.964 | 0.000              | 0.026 | 0.068 |
| inosine                                      | LC/MS neg | 2.91           | 4.72         | 1.62         | 0.02               | 0.04    | 0.00         | 0.00    | 0.14         | 0.88    | 0.300       | 0.873 | 1.416 | 0.000              | 0.817 | 0.931 |
| N1-methyladenosine                           | LC/MS pos | 0.93           | 0.78         | 0.84         | 0.38               | 0.19    | 0.02         | 0.02    | 0.39         | 0.90    | 1.087       | 1.013 | 0.851 | 0.202              | 0.422 | 0.216 |
| adenosine 5'-monophosphate (AMP)             | LC/MS pos | 0.55           | 0.54         | 0.98         | 0.02               | 0.04    | 0.02         | 0.02    | 0.34         | 0.88    | 1.350       | 0.742 | 0.729 | 0.964              | 0.039 | 0.000 |
| guanosine                                    | LC/MS neg | 1.52           | 2            | 1.32         | 0.06               | 0.07    | 0.01         | 0.01    | 0.22         | 0.88    | 0.505       | 0.765 | 1.007 | 0.000              | 0.436 | 0.492 |
| urate                                        | LC/MS neg | 1.11           | 1.06         | 0.95         | 0.28               | 0.17    | 0.44         | 0.18    | 0.64         | 0.96    | 0.978       | 1.085 | 1.034 | 0.191              | 0.221 | 0.161 |
| uridine                                      | LC/MS neg | 1.05           | 1.31         | 1.25         | 0.75               | 0.26    | 0.04         | 0.03    | 0.07         | 0.88    | 0.906       | 0.948 | 1.184 | 0.289              | 0.258 | 0.238 |
| pseudouridine                                | LC/MS neg | 1.48           | 1.64         | 1.11         | 0.11               | 0.10    | 0.07         | 0.05    | 0.76         | 0.98    | 0.946       | 1.403 | 1.554 | 0.256              | 0.993 | 1.274 |
| ascorbate (Vitamin C)                        | GC/MS     | 7.15           | 11.46        | 1.6          | 0.00               | 0.01    | 0.00         | 0.00    | 0.19         | 0.88    | 0.114       | 0.811 | 1.301 | 0.000              | 0.668 | 0.999 |
| threonate                                    | GC/MS     | 2.65           | 3.27         | 1.23         | 0.03               | 0.04    | 0.00         | 0.00    | 0.18         | 0.88    | 0.453       | 1.203 | 1.483 | 0.296              | 0.711 | 0.439 |
| heme                                         | LC/MS pos | 0.34           | 0.1          | 0.3          | 0.01               | 0.03    | 0.00         | 0.00    | 0.23         | 0.88    | 5.139       | 1.747 | 0.529 | 4.173              | 2.381 | 0.492 |
| bilirubin (Z,Z)                              | LC/MS neg | 2.01           | 1.43         | 0.71         | 0.33               | 0.18    | 0.08         | 0.05    | 0.97         | 0.99    | 0.901       | 1.814 | 1.291 | 0.312              | 1.979 | 0.521 |
| bilirubin (E,E)*                             | LC/MS neg | 1.29           | 1.07         | 0.83         | 0.72               | 0.26    | 0.57         | 0.22    | 0.97         | 0.99    | 1.058       | 1.368 | 1.129 | 0.428              | 0.848 | 0.353 |
| bilirubin (E,Z or Z,E)*                      | LC/MS pos | 1.02           | 0.74         | 0.73         | 0.44               | 0.21    | 0.25         | 0.12    | 0.87         | 0.98    | 1.288       | 1.319 | 0.958 | 0.862              | 1.312 | 0.458 |
| biliverdin                                   | LC/MS pos | 0.92           | 0.33         | 0.36         | 0.14               | 0.12    | 0.00         | 0.00    | 0.62         | 0.95    | 1.729       | 1.595 | 0.568 | 1.245              | 1.879 | 0.295 |
| nicotinamide                                 | LC/MS pos | 0.86           | 0.65         | 0.76         | 0.37               | 0.19    | 0.04         | 0.03    | 0.35         | 0.88    | 1.240       | 1.064 | 0.810 | 0.539              | 0.594 | 0.408 |
| pantothenate                                 | LC/MS pos | 0.95           | 1.44         | 1.52         | 0.73               | 0.26    | 0.47         | 0.19    | 0.34         | 0.88    | 0.847       | 0.804 | 1.220 | 0.407              | 0.472 | 1.031 |
| alpha-tocopherol                             | GC/MS     | 1.31           | 1.79         | 1.36         | 0.16               | 0.12    | 0.03         | 0.03    | 0.03         | 0.88    | 0.782       | 1.026 | 1.397 | 0.428              | 0.331 | 0.472 |
| gamma-tocopherol                             | GC/MS     | 1.02           | 1.81         | 1.77         | 0.82               | 0.28    | 0.04         | 0.03    | 0.05         | 0.88    | 0.502       | 0.512 | 0.908 | 0.059              | 0.089 | 0.552 |
| pyridoxate                                   | LC/MS neg | 1.55           | 1.81         | 1.17         | 0.59               | 0.24    | 0.01         | 0.01    | 0.14         | 0.88    | 0.818       | 1.270 | 1.485 | 0.525              | 1.797 | 0.753 |
| hippurate                                    | LC/MS neg | 2.88           | 1.62         | 0.56         | 0.34               | 0.18    | 0.92         | 0.31    | 0.42         | 0.90    | 1.092       | 3.145 | 1.765 | 0.936              | 5.985 | 3.096 |
| 2-hydroxyhippurate (salicylurate)            | LC/MS neg | 1.11           | 4.34         | 3.92         | 0.84               | 0.28    | 0.34         | 0.15    | 0.42         | 0.90    | 0.524       | 0.581 | 2.275 | 0.437              | 0.508 | 5.448 |
| catechol sulfate                             | LC/MS neg | 1.44           | 1.24         | 0.86         | 0.78               | 0.27    | 0.29         | 0.14    | 0.48         | 0.92    | 1.089       | 1.573 | 1.352 | 1.007              | 2.604 | 0.806 |
| 4-vinylphenol sulfate                        | LC/MS neg | 1.32           | 2.18         | 1.65         | 0.92               | 0.29    | 0.25         | 0.12    | 0.34         | 0.88    | 1.059       | 1.403 | 2.310 | 0.788              | 1.524 | 2.576 |
| glycolate (hydroxyacetate)                   | GC/MS     | 0.85           | 0.83         | 0.98         | 0.18               | 0.13    | 0.12         | 0.07    | 0.81         | 0.98    | 0.850       | 0.721 | 0.706 | 0.247              | 0.139 | 0.096 |
| iminodiacetate (IDA)                         | GC/MS     | 0.32           | 0.15         | 0.45         | 0.00               | 0.00    | 0.00         | 0.00    | 0.20         | 0.88    | 4.452       | 1.439 | 0.655 | 2.340              | 1.630 | 0.266 |
| salicylate                                   | LC/MS neg | 0.46           | 0.63         | 1.38         | 0.70               | 0.26    | 0.61         | 0.23    | 0.28         | 0.88    | 1.509       | 0.692 | 0.958 | 3.378              | 0.873 | 0.736 |
| salicyluric glucuronide*                     | LC/MS neg | 1.72           | 4.67         | 2.71         | 0.33               | 0.18    | 0.18         | 0.09    | 0.49         | 0.92    | 0.397       | 0.684 | 1.855 | 0.248              | 0.890 | 3.931 |

| Supplemental Data Table 1<br>UNNM-01-12VW |           | Fold of Change |              |              | Statistical Values |         |              |         |              |         | Mean Values |       |        | Standard Deviation |        |        |
|-------------------------------------------|-----------|----------------|--------------|--------------|--------------------|---------|--------------|---------|--------------|---------|-------------|-------|--------|--------------------|--------|--------|
|                                           |           | CKD3<br>CKD2   | CKD4<br>CKD2 | CKD4<br>CKD3 | CKD3<br>CKD2       |         | CKD4<br>CKD2 |         | CKD4<br>CKD3 |         | CKD2        | CKD3  | CKD4   | CKD2               | CKD3   | CKD4   |
|                                           |           |                |              |              | p-value            | q-value | p-value      | q-value | p-value      | q-value |             |       |        |                    |        |        |
| Biochemical Name                          | Platform  |                |              |              |                    |         |              |         |              |         |             |       |        |                    |        |        |
| 4-acetamidophenol                         | LC/MS pos | 1.37           | 1.24         | 0.91         | 0.69               | 0.26    | 0.85         | 0.29    | 0.84         | 0.98    | 0.414       | 0.568 | 0.514  | 0.281              | 0.607  | 0.605  |
| p-acetamidophenylglucuronide              | LC/MS neg | 1.61           | 1.32         | 0.82         | 0.40               | 0.20    | 0.37         | 0.16    | 0.91         | 0.99    | 0.387       | 0.624 | 0.510  | 0.192              | 0.733  | 0.363  |
| 2-propylpentanoate (valproate)            | LC/MS neg | 2.32           | 2.29         | 0.98         | 0.00               | 0.00    | 0.00         | 0.00    | 0.91         | 0.99    | 0.541       | 1.257 | 1.238  | 0.251              | 0.561  | 0.394  |
| pioglitazone*                             | LC/MS pos | 1              | 1            | 1            |                    |         |              |         |              |         | 1.000       | 1.000 | 1.000  | 0.000              | 0.000  | 0.000  |
| hydroxypioglitazone*                      | LC/MS pos | 1              | 1            | 1            |                    |         |              |         |              |         | 1.000       | 1.000 | 1.000  | 0.000              | 0.000  | 0.000  |
| naproxen                                  | GC/MS     | 1              | 1            | 1            |                    |         |              |         |              |         | 1.000       | 1.000 | 1.000  | 0.000              | 0.000  | 0.000  |
| metformin                                 | LC/MS pos | 1              | 1            | 1            |                    |         |              |         |              |         | 1.000       | 1.000 | 1.000  | 0.000              | 0.000  | 0.000  |
| metoprolol                                | LC/MS pos | 1              | 2.04         | 2.04         |                    |         | 0.17         | 0.09    | 0.17         | 0.88    | 0.190       | 0.190 | 0.388  | 0.000              | 0.000  | 0.427  |
| metoprolol acid metabolite*               | LC/MS pos | 9.28           | 64.82        | 6.98         | 0.29               | 0.18    | 0.16         | 0.09    | 0.48         | 0.92    | 0.454       | 4.216 | 29.440 | 0.046              | 11.746 | 75.934 |
| hydrochlorothiazide                       | LC/MS neg | 1              | 1            | 1            |                    |         |              |         |              |         | 1.000       | 1.000 | 1.000  | 0.000              | 0.000  | 0.000  |
| EDTA                                      | LC/MS neg | 0.67           | 0.55         | 0.83         | 0.00               | 0.02    | 0.00         | 0.00    | 0.17         | 0.88    | 0.933       | 0.621 | 0.514  | 0.232              | 0.227  | 0.000  |
| quininate                                 | GC/MS     | 1.25           | 3.03         | 2.42         | 0.74               | 0.26    | 0.12         | 0.07    | 0.21         | 0.88    | 0.451       | 0.564 | 1.368  | 0.267              | 0.517  | 2.202  |
| piperine                                  | LC/MS pos | 2.65           | 3.61         | 1.36         | 0.04               | 0.06    | 0.01         | 0.01    | 0.43         | 0.91    | 0.460       | 1.217 | 1.658  | 0.459              | 0.830  | 1.495  |
| thymol sulfate                            | LC/MS neg | 1.03           | 2.46         | 2.38         | 0.75               | 0.26    | 0.51         | 0.20    | 0.37         | 0.90    | 0.925       | 0.957 | 2.278  | 0.981              | 1.295  | 3.941  |
| N-(2-furoyl)glycine                       | LC/MS neg | 0.76           | 0.75         | 0.98         | 0.59               | 0.24    | 0.55         | 0.21    | 0.92         | 0.99    | 0.770       | 0.585 | 0.576  | 0.746              | 0.163  | 0.132  |
| stachydrine                               | LC/MS pos | 2.07           | 0.58         | 0.28         | 0.36               | 0.19    | 0.95         | 0.32    | 0.26         | 0.88    | 2.383       | 4.932 | 1.384  | 3.495              | 8.117  | 1.796  |
| homostachydrine*                          | LC/MS pos | 0.86           | 0.72         | 0.83         | 0.45               | 0.21    | 0.08         | 0.05    | 0.27         | 0.88    | 1.206       | 1.043 | 0.867  | 0.463              | 0.380  | 0.299  |
| caffeine                                  | LC/MS pos | 0.92           | 0.17         | 0.19         | 0.17               | 0.13    | 0.00         | 0.00    | 0.29         | 0.88    | 3.474       | 3.202 | 0.606  | 2.179              | 4.686  | 0.319  |
| paraxanthine                              | LC/MS pos | 0.78           | 0.37         | 0.48         | 0.29               | 0.18    | 0.03         | 0.03    | 0.38         | 0.90    | 1.693       | 1.318 | 0.626  | 1.165              | 1.723  | 0.341  |
| theobromine                               | LC/MS pos | 0.45           | 0.36         | 0.81         | 0.21               | 0.14    | 0.14         | 0.08    | 0.82         | 0.98    | 2.499       | 1.125 | 0.908  | 2.701              | 0.962  | 0.473  |
| theophylline                              | LC/MS pos | 0.85           | 0.54         | 0.63         | 0.56               | 0.23    | 0.07         | 0.05    | 0.24         | 0.88    | 1.348       | 1.150 | 0.727  | 0.816              | 0.859  | 0.255  |
| 1-methylurate                             | LC/MS pos | 2.05           | 0.94         | 0.46         | 0.50               | 0.22    | 0.74         | 0.27    | 0.38         | 0.90    | 0.652       | 1.336 | 0.613  | 0.321              | 2.258  | 0.342  |
| 1,7-dimethylurate                         | LC/MS pos | 1.51           | 0.79         | 0.52         | 0.70               | 0.26    | 0.10         | 0.06    | 0.24         | 0.88    | 0.701       | 1.059 | 0.553  | 0.264              | 1.442  | 0.000  |
| 1-methylxanthine                          | LC/MS pos | 1.03           | 1            | 0.97         | 0.86               | 0.28    | 0.89         | 0.30    | 0.95         | 0.99    | 0.749       | 0.774 | 0.749  | 0.163              | 0.418  | 0.237  |
| 3-methylxanthine                          | LC/MS pos | 0.87           | 0.7          | 0.8          | 0.40               | 0.20    | 0.38         | 0.16    | 0.87         | 0.98    | 0.836       | 0.729 | 0.586  | 0.652              | 0.931  | 0.218  |
| 5-acetylamino-6-amino-3-methyluracil      | LC/MS neg | 1.8            | 1            | 0.55         | 0.34               | 0.18    |              |         | 0.34         | 0.88    | 0.199       | 0.360 | 0.199  | 0.000              | 0.506  | 0.000  |
| cotinine                                  | LC/MS pos | 1              | 1.05         | 1.05         |                    |         | 0.34         | 0.15    | 0.34         | 0.88    | 0.785       | 0.785 | 0.828  | 0.000              | 0.000  | 0.136  |
| erythritol                                | GC/MS     | 1.53           | 1.55         | 1.02         | 0.29               | 0.18    | 0.15         | 0.08    | 0.80         | 0.98    | 0.986       | 1.508 | 1.533  | 0.376              | 1.390  | 1.228  |
